# Supplementary material
Source: PubMed Central journal article supplement (PMC4463213)
Supplement: JCI80743sd.pdf [file JCI80743sd.pdf]

1

## Supplemental data

2

3

### **Mutant huntingtin protein in Huntington's disease**

4

### **cerebrospinal fluid**

5

Edward J. Wild, Roberto Boggio, Douglas Langbehn, Nicola Robertson, Salman Haider,

6

James R. C. Miller, Henrik Zetterberg, Blair R. Leavitt, Rainer Kuhn, Sarah J. Tabrizi,

7

Douglas Macdonald and Andreas Weiss

8

9

## Supplemental data

1 **Supplemental figure 1**

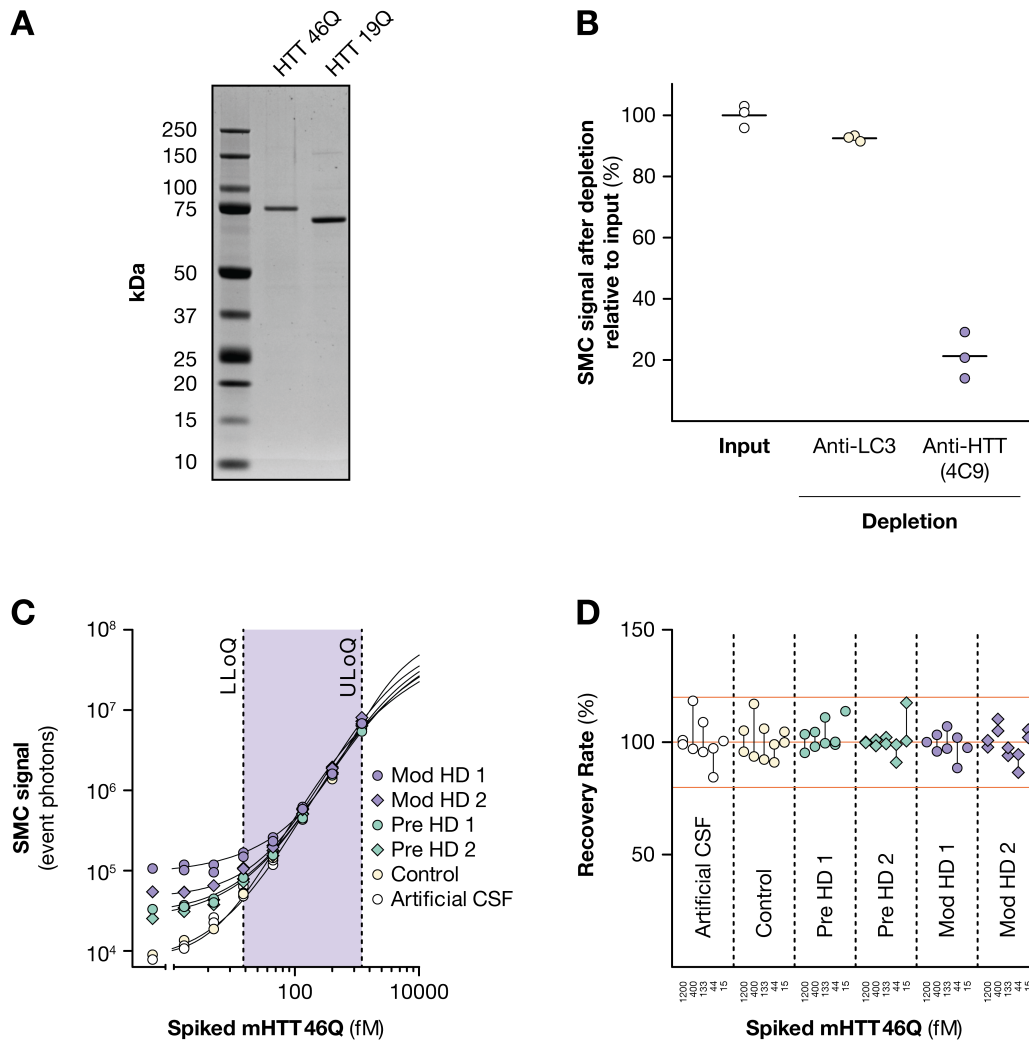

2

3 **Supplemental Figure 1. A)** Purity and quality control of recombinant N-terminal  
 4 (N458) human wild-type (HTT 19Q) and mutant (HTT 46Q) huntingtin proteins shown  
 5 by Coomassie blue SDS page gel. **B)** Immunodepletion experiment with a non-  
 6 huntingtin control antibody (anti-LC3) and the anti-huntingtin antibody 4C9, designed  
 7 against an epitope that is not recognized by either of the antibodies used in the  
 8 detection assay, shows the specific detection of huntingtin protein by the assay (n=3  
 9 replications per experiment). **C-D)** Recovery rates of purified mutant huntingtin  
 10 protein spiked into independent human CSF samples from healthy control,

1 premanifest Huntington's disease and moderate Huntington's disease patients (n=2  
2 replications per sample).

3

1 **Supplemental figure 2**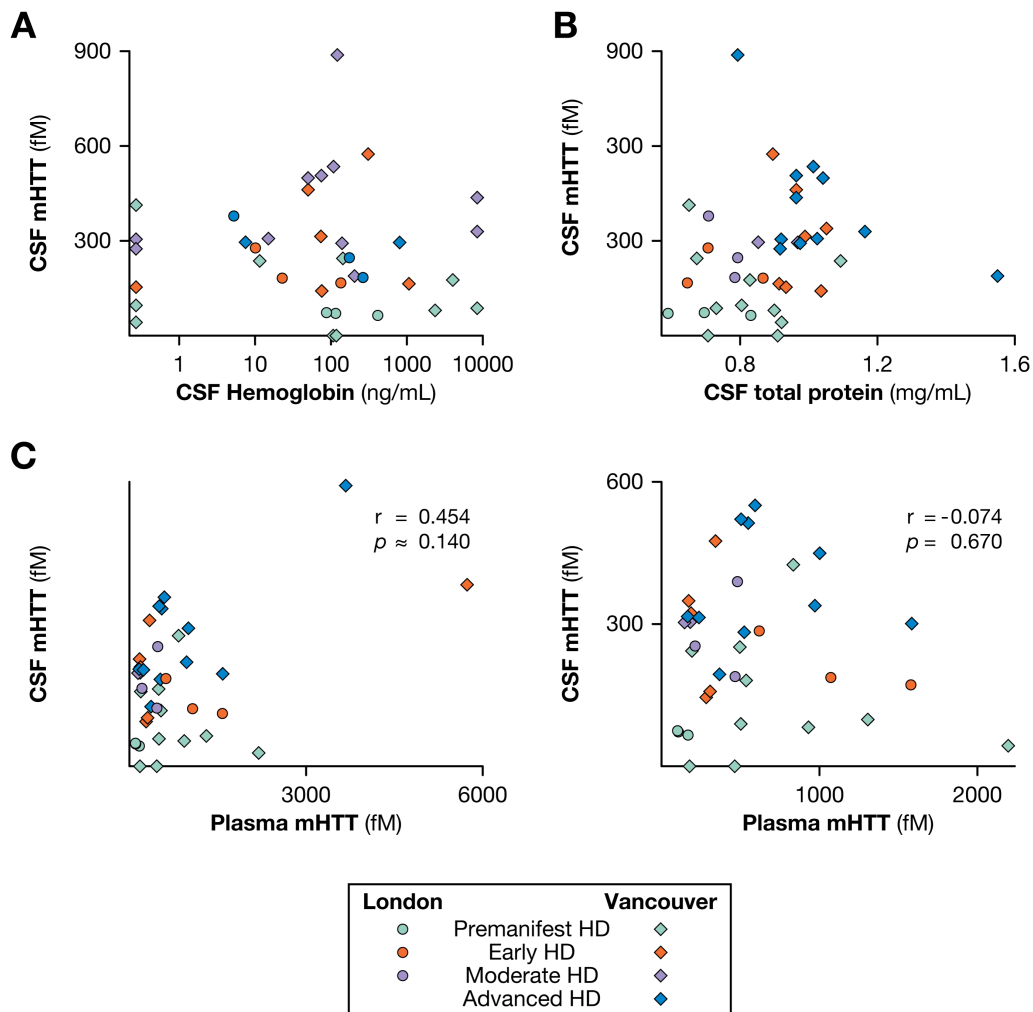

2

3 **Supplemental Figure 2. A)** Relationship between CSF mHTT and CSF hemoglobin.

4 Values outside the quantifiable range of the assay are shown as having the lower

5 (n=6) and upper (n=3) quantifiable values. Spearman Rank analysis: n=9, r=-0.55,

6  $p=0.125$  for London; n=29, r=0.01,  $p=0.945$  for Vancouver. There was no statistically

7 significant difference in hemoglobin values between the London and Vancouver

8 cohorts ( $p=0.63$  by Wilcoxon test). **B)** Relationship between CSF mHTT protein and9 CSF total protein. Linear regression: n=9,  $R=0.0816$ ,  $p=0.835$  for London; n=30,10  $R=0.0376$ ,  $p=0.844$  for Vancouver. **C-D)** Relationship between matched CSF and

11 plasma mHTT concentrations. No significant association was seen between CSF and

- 1 matched plasma mHTT concentrations (**C**) in the whole dataset (linear regression
- 2 with 95% bootstrap confidence interval -0.145 to 0.740; n=38) or (**D**) after the
- 3 exclusion of two extreme outliers (Linear regression:  $r=-0.074$ .  $p=0.670$ ; n=36).

## Supplemental table 1

### A. Before controlling for disease burden score

| CSF protein |          | SDMT          | Stroop Color  | Stroop Word   | Stroop Interference |
|-------------|----------|---------------|---------------|---------------|---------------------|
| <b>mHTT</b> | R        | -0.565        | -0.620        | -0.612        | -0.505              |
|             | <i>p</i> | <b>0.0062</b> | <b>0.0012</b> | <b>0.0015</b> | <b>0.012</b>        |
|             | <i>q</i> | 0.083         | 0.030         | 0.030         | 0.012               |
|             | n        | 22            | 24            | 24            | 24                  |
| <b>Tau</b>  | R        | -0.437        | -0.382        | -0.363        | -0.30168            |
|             | <i>p</i> | <b>0.042</b>  | 0.065         | 0.082         | 0.15                |
|             | <i>q</i> | 0.11          | 0.11          | 0.11          | 0.15                |
|             | n        | 22            | 24            | 24            | 24                  |
| <b>NFL</b>  | R        | -0.699        | -0.838        | -0.744        | -0.792              |
|             | <i>p</i> | <b>0.012</b>  | <b>0.0002</b> | <b>0.0023</b> | <b>0.0007</b>       |
|             | <i>q</i> | <b>0.012</b>  | <b>0.0008</b> | <b>0.0031</b> | <b>0.0014</b>       |
|             | n        | 12            | 14            | 14            | 14                  |

### B. After controlling for disease burden score

| CSF protein |                         | SDMT         | Stroop Color | Stroop Word  | Stroop Interference |
|-------------|-------------------------|--------------|--------------|--------------|---------------------|
| <b>mHTT</b> | R                       | -0.440       | -0.512       | -0.500       | -0.331              |
|             | <i>p</i>                | <b>0.046</b> | <b>0.012</b> | <b>0.015</b> | 0.12                |
|             | <i>p</i> <sub>FDR</sub> | 0.061        | <b>0.038</b> | <b>0.038</b> | 0.096               |
|             | n                       | 22           | 24           | 24           | 24                  |
| <b>Tau</b>  | R                       | -0.376       | -0.343       | -0.321       | -0.251              |
|             | <i>p</i>                | 0.093        | 0.11         | 0.14         | 0.25                |
|             | <i>p</i> <sub>FDR</sub> | 0.18         | 0.18         | 0.18         | 0.25                |
|             | n                       | 22           | 24           | 24           | 24                  |
| <b>NFL</b>  | R                       | -0.553       | -0.626       | -0.449       | -0.547              |
|             | <i>p</i>                | 0.078        | <b>0.022</b> | 0.124        | 0.053               |
|             | <i>p</i> <sub>FDR</sub> | 0.10         | 0.08         | 0.12         | 0.10                |
|             | n                       | 12           | 14           | 14           | 14                  |

**Supplemental table 2.** Associations between individual CSF proteins and cognitive scores (A) before and (B) after adjustment for disease burden score. Linear regression analysis. p-values below the 0.05 significance threshold are in bold. *q*, FDR value accounting for multiple comparisons.
